# Supplementary material for: Pt(0) and Pd(0) based metallocryptands: metallophilic hosts for Pb(ii) ion
Source: Royal Society of Chemistry journal article supplement (doi:10.1039/b003758n), 2000-01-01

*Preparation of  $[Pt_2Pb(P_2Phen)_3](ClO_4)_2$ , **2**.*

A 250 mL round bottomed flask was charged with 0.100 g [0.182 mmol] of 2,9-bis(diphenylphosphino)-1,10-phenanthroline dissolved in 20 mL of  $CH_2Cl_2$ .  $Pb(ClO_4)_2$  0.084g [0.182 mmol] (dissolved in 40 mL of MeOH/MeCN) was added slowly with swirling. After stirring for 10 minutes a suspension of 0.081g  $(dba)_2Pt$  [0.122 mmol] in 50 mL of MeOH was added. After stirring an additional 12 hours, volatiles were removed and residue dissolved in a minimum amount of MeCN. Flash chromatography (alumina) eluting with MeCN followed by precipitation with  $Et_2O$  affords 0.110g [0.0450 mmol] of **2** as a brown solid (76%).  $C_{114}H_{84}Cl_2N_6O_8P_6PbPt_2$  Calc (%) C 54.34, H 3.36, N 3.33; Found C 54.66, H 2.87, N 3.51.  $^1H$  NMR (499.8 MHz, 25°C, acetone- $d_6$ )  $\delta$  8.44 (d,  $J = 8.5$  Hz, 6H) 8.069 (s, 6H) 7.66 (d,  $J = 8.5$  Hz, 6H) 7.41 (t,  $J = 8.0$  Hz, 6H) 7.14 (m-br, 12H) 6.97 (t,  $J = 8.5$  Hz, 12H) 6.4 (t,  $J = 7.5$  Hz, 6H) 6.35 (m-br, 12H) 6.22 (t,  $J = 7.5$  Hz, 12H).  $^{31}P\{^1H\}$  (121 MHz,  $CDCl_3/DCM/MeOH$ , 25°C)  $\delta$  48.1 (s,  $^1J_{Pt-P} = 4085$  Hz);  $^{195}Pt$  (107.1 MHz, MeOH/acetone- $d_6$ , ext. ref.  $H_2PtCl_6$  in  $D_2O$ , 25°C)  $\delta$  -2856 (q,  $^1J_{P-Pt} = 4085$  Hz). UV-Vis ( $CH_2Cl_2$ , 0.005495 mM):  $\lambda$  in nm ( $\epsilon$  in  $M^{-1}cm^{-1}$ ): 231 (139820), 291 (112720), 319\* (99443), 470 (5003). [\* denotes shoulder]

MALDI-TOF spectrum for  $[Pt_2Pb(P_2Phen)_3](ClO_4)_2$ , **2**.

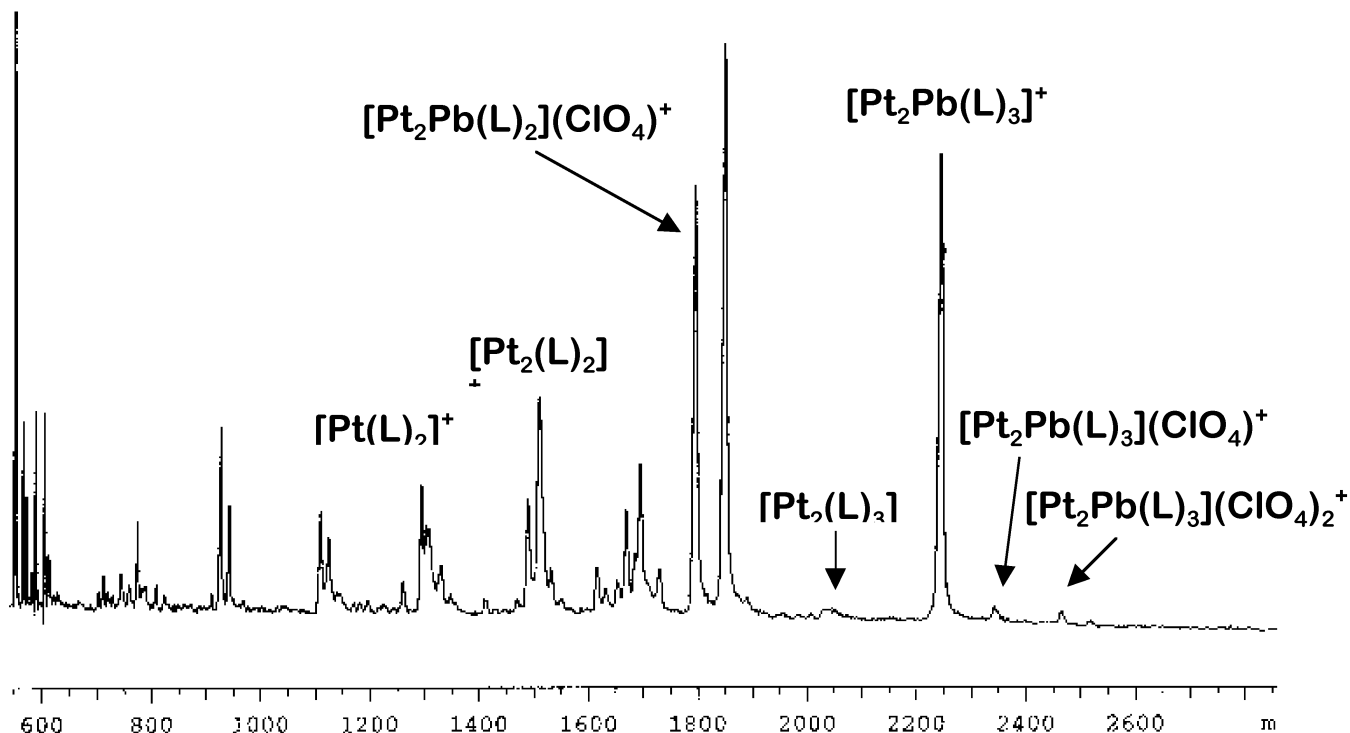

Supplement: b003758n.pdf [file b003758n.pdf]
